# Supplementary material for: The relation between age and airway epithelial barrier function
Source: Respir Res. 2022 Mar 3;23:43. doi: 10.1186/s12931-022-01961-7 (PMC8892715; doi:10.1186/s12931-022-01961-7)
Supplement: Supplementary file 2 — Additional file 2: Table S1. Gene list used for selection of the genes. [file 12931_2022_1961_MOESM2_ESM.xlsx]

## Sheet: INFO
Gene list used for selection of the genes
Downloaded at 10-07-2020
Apical junctin complex	https://www.gsea-msigdb.org/gsea/msigdb/cards/GO_APICAL_JUNCTION_COMPLEX.html	> A functional unit located near the cell apex at the points of contact between epithelial cells, which in vertebrates is composed of the tight junction, the zonula adherens, and desmosomes and in some invertebrates, such as Drosophila, is composed of the subapical complex (SAC), the zonula adherens and the septate junction. Functions in the regulation of cell polarity, tissue integrity and inter…
Tight junction	https://www.gsea-msigdb.org/gsea/msigdb/cards/GO_TIGHT_JUNCTION.html	> A cell-cell junction that seals cells together in an epithelium in a way that prevents even small molecules from leaking from one side of the sheet to the other. [ISBN:0815332181]
Adherens junction	https://www.gsea-msigdb.org/gsea/msigdb/cards/GO_ADHERENS_JUNCTION.html	> A cell-cell junction composed of the epithelial cadherin-catenin complex. The epithelial cadherins, or E-cadherins, of each interacting cell extend through the plasma membrane into the extracellular space and bind to each other. The E-cadherins bind to catenins on the cytoplasmic side of the membrane, where the E-cadherin-catenin complex binds to cytoskeletal components and regulatory and signa…

## Sheet: Apical junction complex
GO_APICAL_JUNCTION_COMPLEX
ADCYAP1R1
AMOT
AMOTL1
AMOTL2
ANK3
AOC1
APC
ARHGAP17
ARHGEF2
ASH1L
BVES
C1QTNF5
CAMSAP3
CCDC85C
CCND1
CDH1
CDH5
CDK4
CGN
CGNL1
CLDN1
CLDN10
CLDN11
CLDN12
CLDN14
CLDN15
CLDN16
CLDN17
CLDN18
CLDN19
CLDN2
CLDN20
CLDN22
CLDN23
CLDN24
CLDN25
CLDN3
CLDN34
CLDN4
CLDN5
CLDN6
CLDN7
CLDN8
CLDN9
CLMP
CRB3
CTNNA1
CTNNB1
CTNND1
CXADR
CYTH1
CYTH2
CYTH3
DDX58
DLG1
DLG3
ECT2
EPB41L4B
EPCAM
EPPK1
ESAM
F11R
FBF1
FRMD4A
FRMD4B
FRMD6
FRMPD2
FZD5
IGSF5
JAM2
JAM3
JAML
JUP
KIFC3
LIN7A
LIN7B
LIN7C
MAGI1
MAGI2
MAGI3
MAPK15
MARVELD2
MARVELD3
MICALL2
MPDZ
MPP5
MPP7
MTDH
MXRA8
NECTIN1
NECTIN2
NECTIN3
NHS
NPHP1
NPHP4
OCLN
PARD3
PARD3B
PARD6A
PARD6B
PARD6G
PATJ
PDCD6IP
PDZD3
PKN2
PLEKHA7
PLXDC1
PMP22
POF1B
PRKCI
PRKCZ
RAB13
RAP2B
RAP2C
RAPGEF2
RHOA
RPGRIP1L
SAPCD2
SH3BP1
SHROOM1
SHROOM2
SHROOM3
SHROOM4
SORBS1
STRN
SYMPK
SYNPO
TBCD
TGFBR1
TJAP1
TJP1
TJP2
TJP3
TRAF4
UBN1
USP53
VAPA
VASP
WNK3
WNK4
YBX3

## Sheet: Tight junction
GO_TIGHT_JUNCTION
ADCYAP1R1
AFDN
AMOT
AMOTL1
AMOTL2
ANK3
AOC1
APC
ARHGAP17
ARHGEF2
ASH1L
BVES
C1QTNF5
CCDC85C
CCND1
CDH5
CDK4
CGN
CGNL1
CLDN1
CLDN10
CLDN11
CLDN12
CLDN14
CLDN15
CLDN16
CLDN17
CLDN18
CLDN19
CLDN2
CLDN20
CLDN22
CLDN23
CLDN24
CLDN25
CLDN3
CLDN34
CLDN4
CLDN5
CLDN6
CLDN7
CLDN8
CLDN9
CLMP
CRB3
CTNNB1
CXADR
CYTH1
CYTH2
CYTH3
DDX58
DLG1
DLG3
ECT2
EPB41L4B
EPCAM
EPHA2
EPPK1
ESAM
F11R
FRMD4A
FRMD4B
FRMPD2
FZD5
GJA1
IGSF5
ILDR1
JAM2
JAM3
JAML
LIN7A
LIN7B
LIN7C
LSR
MAGI1
MAGI2
MAGI3
MAPK15
MARVELD2
MARVELD3
MICALL2
MPDZ
MPP5
MPP7
MTDH
MXRA8
NHS
NPHP1
NPHP4
OCLN
PARD3
PARD3B
PARD6A
PARD6B
PARD6G
PATJ
PDCD6IP
PLXDC1
PMP22
POF1B
PRKCI
PRKCZ
RAB13
RAP2B
RAP2C
RAPGEF2
RPGRIP1L
SAPCD2
SH3BP1
SHROOM2
SIPA1L3
STRN
SYMPK
SYNPO
TBCD
TGFBR1
TJAP1
TJP1
TJP2
TJP3
TRAF4
UBN1
USP53
VAPA
VASP
WNK3
WNK4
YBX3

## Sheet: Adherens junction
GO_ADHERENS_JUNCTION
ABI2
AC020929.1
ADAM15
ADD1
AFDN
AHI1
AJAP1
AJM1
AJUBA
ANXA1
ANXA2
APC
ARVCF
BAIAP2
BAIAP2L1
BMPR2
CAMSAP3
CD96
CD99L2
CDC42EP1
CDC42EP4
CDCA3
CDH1
CDH10
CDH11
CDH12
CDH13
CDH15
CDH17
CDH18
CDH19
CDH2
CDH23
CDH24
CDH26
CDH3
CDH4
CDH5
CDH6
CDH7
CDH8
CDH9
CDHR3
CEACAM1
CNN3
CRB1
CTNNA1
CTNNA2
CTNNB1
CTNND1
CTNND2
CXADR
CYTH1
CYTH2
CYTH3
DAG1
DDX6
DLG1
DLG5
DLL1
DSC2
EFNA5
EIF4G2
EPHA4
ESAM
FAT2
FLOT1
FLOT2
FMN1
FRMD4A
FRMD4B
FRMD5
FRS2
HMCN1
IGSF21
ITGA6
JAG1
JCAD
JUP
KIFC3
KLHL24
KRT18
LDB3
LIMD1
LIN7A
LIN7B
LIN7C
LRRC1
LRRC7
LYN
MAGI1
MISP
MPP4
MPP5
MPP7
MYH9
MYO1E
NDRG1
NECTIN1
NECTIN2
NECTIN3
NECTIN4
NF2
NIBAN2
NOTCH1
NPHP1
OXTR
PAK4
PARD3
PARD3B
PARK7
PDLIM1
PDLIM2
PDLIM3
PDLIM4
PDLIM5
PDLIM7
PDZD11
PGM5
PIANP
PKP1
PKP2
PKP3
PKP4
PLEKHA7
PLPP3
POF1B
PPP1CA
PPP1R9B
PRICKLE4
PTK2
PTPRK
PTPRM
PVR
PXN
RAB10
RDX
RND1
S100A11
SCRIB
SDCBP
SH3BP1
SHROOM1
SHROOM2
SHROOM3
SHROOM4
SMAD7
SNAP23
SORBS1
SSX2IP
STXBP6
SYNM
TBCD
TJP1
TJP2
TMEM204
TMEM47
TMOD3
TNK2
TNKS1BP1
TRIM29
TRPV4
TSPAN33
VCL
VEGFA
VEZT
WNK3
WTIP
ZYX

## Sheet: Combined unique genes
ABI2
AC020929.1
ADAM15
ADCYAP1R1
ADD1
AFDN
AHI1
AJAP1
AJM1
AJUBA
AMOT
AMOTL1
AMOTL2
ANK3
ANXA1
ANXA2
AOC1
APC
ARHGAP17
ARHGEF2
ARVCF
ASH1L
BAIAP2
BAIAP2L1
BMPR2
BVES
C1QTNF5
CAMSAP3
CCDC85C
CCND1
CD96
CD99L2
CDC42EP1
CDC42EP4
CDCA3
CDH1
CDH10
CDH11
CDH12
CDH13
CDH15
CDH17
CDH18
CDH19
CDH2
CDH23
CDH24
CDH26
CDH3
CDH4
CDH5
CDH6
CDH7
CDH8
CDH9
CDHR3
CDK4
CEACAM1
CGN
CGNL1
CLDN1
CLDN10
CLDN11
CLDN12
CLDN14
CLDN15
CLDN16
CLDN17
CLDN18
CLDN19
CLDN2
CLDN20
CLDN22
CLDN23
CLDN24
CLDN25
CLDN3
CLDN34
CLDN4
CLDN5
CLDN6
CLDN7
CLDN8
CLDN9
CLMP
CNN3
CRB1
CRB3
CTNNA1
CTNNA2
CTNNB1
CTNND1
CTNND2
CXADR
CYTH1
CYTH2
CYTH3
DAG1
DDX58
DDX6
DLG1
DLG3
DLG5
DLL1
DSC2
ECT2
EFNA5
EIF4G2
EPB41L4B
EPCAM
EPHA2
EPHA4
EPPK1
ESAM
F11R
FAT2
FBF1
FLOT1
FLOT2
FMN1
FRMD4A
FRMD4B
FRMD5
FRMD6
FRMPD2
FRS2
FZD5
GJA1
HMCN1
IGSF21
IGSF5
ILDR1
ITGA6
JAG1
JAM2
JAM3
JAML
JCAD
JUP
KIFC3
KLHL24
KRT18
LDB3
LIMD1
LIN7A
LIN7B
LIN7C
LRRC1
LRRC7
LSR
LYN
MAGI1
MAGI2
MAGI3
MAPK15
MARVELD2
MARVELD3
MICALL2
MISP
MPDZ
MPP4
MPP5
MPP7
MTDH
MXRA8
MYH9
MYO1E
NDRG1
NECTIN1
NECTIN2
NECTIN3
NECTIN4
NF2
NHS
NIBAN2
NOTCH1
NPHP1
NPHP4
OCLN
OXTR
PAK4
PARD3
PARD3B
PARD6A
PARD6B
PARD6G
PARK7
PATJ
PDCD6IP
PDLIM1
PDLIM2
PDLIM3
PDLIM4
PDLIM5
PDLIM7
PDZD11
PDZD3
PGM5
PIANP
PKN2
PKP1
PKP2
PKP3
PKP4
PLEKHA7
PLPP3
PLXDC1
PMP22
POF1B
PPP1CA
PPP1R9B
PRICKLE4
PRKCI
PRKCZ
PTK2
PTPRK
PTPRM
PVR
PXN
RAB10
RAB13
RAP2B
RAP2C
RAPGEF2
RDX
RHOA
RND1
RPGRIP1L
S100A11
SAPCD2
SCRIB
SDCBP
SH3BP1
SHROOM1
SHROOM2
SHROOM3
SHROOM4
SIPA1L3
SMAD7
SNAP23
SORBS1
SSX2IP
STRN
STXBP6
SYMPK
SYNM
SYNPO
TBCD
TGFBR1
TJAP1
TJP1
TJP2
TJP3
TMEM204
TMEM47
TMOD3
TNK2
TNKS1BP1
TRAF4
TRIM29
TRPV4
TSPAN33
UBN1
USP53
VAPA
VASP
VCL
VEGFA
VEZT
WNK3
WNK4
WTIP
YBX3
ZYX
