# Supplementary material for: The relation between age and airway epithelial barrier function
Source: Respir Res. 2022 Mar 3;23:43. doi: 10.1186/s12931-022-01961-7 (PMC8892715; doi:10.1186/s12931-022-01961-7)
Supplement: Supplementary file 3 — Additional file 3: Table S2. Summary statistics of the meta-analysis of the age-related gene expression signature of epithelial barrier function in bronchial brushings. [file 12931_2022_1961_MOESM3_ESM.xlsx]

## Sheet: Supplementary table 2.xlsx
Table S2: Summary statistics of the meta-analysis of the age-related gene expression signature of epithelial barrier function in bronchial brushings
	Effect estimate	SE	P-value	FDR
EPCAM	-0.00360498	0.00047521	3.29757e-14	8.93642e-12
TRPV4	0.00385223	0.00058011	3.1256e-11	4.23519e-09
ABP1	0.00465284	0.000709889	5.58965e-11	5.04932e-09
NDRG1	0.00522138	0.000959276	5.23795e-08	2.99682e-06
PKN2	-0.00284324	0.000524428	5.90662e-08	2.99682e-06
F11R	-0.00290283	0.000537483	6.63503e-08	2.99682e-06
KRT18	0.00322969	0.000608346	1.10244e-07	4.26802e-06
CDH12	-0.00926427	0.001755	1.30042e-07	4.40516e-06
TJP2	-0.00261232	0.000505161	2.32522e-07	7.0015e-06
PKP1	0.00413431	0.000809611	3.28117e-07	8.89198e-06
FRMD5	0.00247095	0.000500248	7.83446e-07	1.77171e-05
FAT2	0.00568988	0.00115199	7.84523e-07	1.77171e-05
CNN3	-0.00433553	0.000887268	1.02704e-06	2.14099e-05
AJAP1	0.0111364	0.00233287	1.8087e-06	3.50112e-05
JAG1	0.00463154	0.000992342	3.05215e-06	5.51422e-05
PVRL2	-0.00224557	0.000516155	1.35776e-05	0.000229971
LRRC1	-0.00273601	0.000633441	1.56531e-05	0.000249528
CDH1	-0.00242797	0.000566955	1.84828e-05	0.000278269
BAIAP2L1	-0.00319995	0.000761204	2.62466e-05	0.000374359
CDH15	0.00229618	0.00054959	2.9411e-05	0.000398518
CDH11	0.00560582	0.00135724	3.62269e-05	0.000467499
PDLIM7	0.00329348	0.000799958	3.8373e-05	0.000472686
AJUBA	0.00378644	0.000929105	4.59426e-05	0.000541324
CTNND2	0.00208693	0.000519527	5.89498e-05	0.000665641
MYH9	-0.00315899	0.000790131	6.38648e-05	0.000692294
ECT2	-0.00295698	0.000742826	6.87085e-05	0.000716154
CLDN15	0.0022974	0.000603095	0.000139337	0.00139853
CLDN20	0.00268322	0.000728703	0.000231243	0.00223811
CDH6	0.00991802	0.00271526	0.000259496	0.00242494
TMEM204	0.00579314	0.00163313	0.000389241	0.00351614
SNAP23	-0.00263512	0.000745582	0.000408842	0.00357407
MPP7	-0.00253806	0.000720584	0.000427936	0.00362408
ILDR1	-0.00283766	0.000821117	0.000548556	0.00442312
STXBP6	-0.00375192	0.00108665	0.000554931	0.00442312
MICALL2	0.00211536	0.000620216	0.000648011	0.00491893
CLDN16	-0.00345425	0.00101345	0.000653438	0.00491893
POF1B	-0.00240591	0.000712432	0.000732706	0.00536657
CLDN18	0.00204137	0.000610566	0.000827546	0.00590171
CRB1	0.00301421	0.00090845	0.000906726	0.00630058
EPB41L4B	-0.00182979	0.000563826	0.00117327	0.0079489
CDH2	0.005931	0.00189543	0.00175344	0.0115898
PDCD6IP	-0.00182163	0.000585172	0.00185205	0.0119501
SPTBN4	0.00155478	0.000503144	0.00200073	0.0126093
LYN	-0.00551718	0.00181007	0.00230327	0.0141861
CLDN23	0.00281486	0.000940731	0.00276976	0.0166801
CXADR	-0.00257994	0.000878263	0.00330821	0.0194897
TMOD3	-0.00304909	0.00104683	0.00358347	0.0206621
ARVCF	0.00189343	0.00065231	0.00370015	0.0208904
CDCA3	0.00192948	0.00067071	0.00401765	0.0222201
TNK2	0.00162837	0.000590769	0.00584502	0.03168
PTK2	-0.00110384	0.000402856	0.00614336	0.0326441
FAM129B	-0.00133183	0.000497702	0.00745168	0.0388347
PKP3	0.00252645	0.000957294	0.0083113	0.0424974
CLDN5	0.00148728	0.000570156	0.00909297	0.0456333
JAM2	0.00161103	0.000619603	0.00931979	0.0459211
KIFC3	0.00164981	0.000647972	0.0108931	0.0527146
TGFBR1	-0.00157474	0.000622289	0.0113882	0.0535789
CLDN6	0.00286215	0.00113212	0.0114671	0.0535789
PKP4	-0.00120523	0.00048537	0.013024	0.0592004
CDH24	0.00197862	0.00079756	0.0131071	0.0592004
CDH7	0.00295014	0.00121356	0.0150582	0.066898
CD96	-0.0108676	0.00448718	0.0154384	0.0674806
LIN7C	-0.00153991	0.000637966	0.0157878	0.0679125
CLDN17	0.0022361	0.000930195	0.016221	0.0686859
CGNL1	0.00214726	0.000898515	0.0168581	0.0702854
FBF1	0.0013712	0.000578839	0.0178421	0.0723456
CDH10	0.00159176	0.000672204	0.0178862	0.0723456
CGN	-0.00257249	0.00109894	0.0192386	0.0766714
WNK3	-0.001876	0.000808411	0.0203083	0.0787932
CLDN4	-0.00203336	0.000876528	0.0203525	0.0787932
C19orf21	-0.00172329	0.000747921	0.0212167	0.0809819
MPP5	-0.00125618	0.000556477	0.0239849	0.0902764
CDH4	0.00211603	0.000955177	0.0267377	0.0992591
AMOTL1	0.00424643	0.00196861	0.0310007	0.113034
AHI1	0.00167411	0.000777406	0.0312825	0.113034
JAM3	0.00207175	0.000980761	0.0346533	0.123567
PDLIM4	0.00149734	0.000730608	0.0404192	0.140622
ANXA2	0.00133327	0.000650731	0.0404742	0.140622
OCLN	-0.0027771	0.00138605	0.0451119	0.154054
CLDN2	0.00203757	0.00102017	0.0457938	0.154054
PVRL3	-0.0027129	0.00135986	0.0460456	0.154054
SCRIB	0.00101856	0.000514087	0.0475578	0.157173
PDZD3	0.0014527	0.000747638	0.0520091	0.16733
VEGFA	-0.00268126	0.00138244	0.0524389	0.16733
CDC42EP1	0.00162346	0.000837205	0.0524835	0.16733
PDLIM1	-0.00116861	0.000604612	0.053257	0.167822
SHROOM4	0.00116868	0.00061231	0.0563078	0.174019
CTNNA1	-0.00120108	0.000630576	0.056814	0.174019
DDX58	-0.00512056	0.00269197	0.0571502	0.174019
NF2	-0.000952127	0.000504457	0.0591025	0.177964
NHS	-0.00115055	0.000617157	0.0622824	0.185478
AMICA1	-0.00933128	0.00503985	0.0640979	0.18881
RDX	-0.00119947	0.000674209	0.0752281	0.219213
WNK4	0.00183311	0.00104959	0.0807237	0.230521
CLMP	0.001244	0.000712482	0.0808101	0.230521
TRAF4	0.000906321	0.000523086	0.0831595	0.234752
PARD6A	0.00116054	0.000673203	0.0847252	0.236707
TBCD	-0.00083526	0.000487972	0.086953	0.240452
CLDN8	0.00362861	0.00212938	0.0883684	0.241088
LDB3	0.00190454	0.00112217	0.0896588	0.241088
CLDN12	-0.00234638	0.00138333	0.089852	0.241088
CTNNB1	-0.000733821	0.000440792	0.095957	0.254179
NPHP4	0.000848826	0.00051087	0.0966067	0.254179
CCND1	-0.0013121	0.00080743	0.104157	0.271409
SYNPO	-0.00126454	0.000780631	0.105254	0.271656
EPPK1	-0.00197587	0.00124455	0.112374	0.287108
SH3BP1	0.000883247	0.000557863	0.11336	0.287108
ADCYAP1R1	0.00130597	0.000828517	0.114963	0.288131
ANK3	-0.000767383	0.00048942	0.116894	0.288131
DAG1	-0.000751345	0.000479269	0.116953	0.288131
EPHA4	-0.00351842	0.00226505	0.12034	0.293802
MAGI3	-0.000973083	0.000637536	0.12693	0.307126
KLHL24	-0.00204821	0.00135895	0.13176	0.313568
DLG1	-0.000746826	0.000496256	0.132344	0.313568
PARD3B	0.00101441	0.000676903	0.133976	0.313568
CLDN14	0.00206687	0.00138007	0.134221	0.313568
CDH19	0.00201736	0.0013552	0.136591	0.316378
CLDN3	-0.00231875	0.00158913	0.14453	0.330827
LIMD1	-0.00207384	0.00142391	0.145271	0.330827
MPDZ	-0.00112905	0.000791093	0.153523	0.345449
CD99L2	0.00230714	0.00161937	0.154241	0.345449
FRS2	-0.000752024	0.000537454	0.161743	0.359281
KIAA1462	0.000903279	0.000648192	0.163457	0.360138
WTIP	0.000812202	0.000590406	0.168925	0.369182
SDCBP	-0.00226339	0.0016771	0.177149	0.377273
TJAP1	0.000792759	0.000588274	0.177786	0.377273
RPGRIP1L	-0.000846316	0.000628563	0.178164	0.377273
PDLIM3	0.00198612	0.00147521	0.178195	0.377273
TRIM29	0.000925702	0.000693715	0.182069	0.382486
CDH23	0.000924944	0.000699564	0.186111	0.38797
VEZT	-0.000682805	0.000518349	0.187749	0.388397
PVRL1	0.00163881	0.00125717	0.19238	0.394962
PDLIM2	0.00152203	0.00117421	0.194904	0.397135
PVRL4	-0.00106109	0.000823721	0.197688	0.399802
IGSF5	0.00129141	0.00102921	0.209565	0.420682
MPP4	0.000858476	0.00070044	0.220341	0.439061
ESAM	0.00169903	0.0014	0.224903	0.444881
PDLIM5	-0.00073199	0.000611175	0.231043	0.453714
SSX2IP	-0.00331196	0.00281283	0.239017	0.465997
PARD3	0.000598407	0.000511988	0.242488	0.469102
FRMD4B	-0.001493	0.00128169	0.244072	0.469102
VCL	-0.000864765	0.00075146	0.249823	0.473735
MAPK15	0.000907395	0.000788763	0.249978	0.473735
TNKS1BP1	-0.000624594	0.000553598	0.259216	0.482424
CRB3	0.000673673	0.00059768	0.25968	0.482424
DLL1	0.000956995	0.000852286	0.261498	0.482424
PMP22	0.00150212	0.00134067	0.262536	0.482424
PRKCZ	0.00158457	0.00141702	0.263464	0.482424
TJP1	-0.000542969	0.00048748	0.265353	0.482622
OXTR	-0.00337286	0.00313127	0.281412	0.508417
PIANP	0.00155072	0.00144712	0.283902	0.50952
HMCN1	0.00161735	0.0015348	0.291981	0.520571
ABI2	-0.0012945	0.00123704	0.295355	0.523146
EPHA2	-0.00134144	0.00130442	0.303773	0.529432
CDH5	0.00130762	0.00127436	0.304845	0.529432
PAK4	0.00126902	0.0012387	0.305609	0.529432
BAIAP2	0.00245597	0.0024028	0.306719	0.529432
CDH9	0.000539307	0.00053493	0.313367	0.537484
C9orf172	0.00398925	0.00397364	0.315413	0.537591
RAB10	-0.000664058	0.000668756	0.320722	0.543223
RND1	-0.00103511	0.00106664	0.331826	0.55854
CDH8	0.001579	0.00170782	0.355188	0.594173
FRMD6	0.00301991	0.00330164	0.360364	0.599133
PRICKLE4	0.000948419	0.0010756	0.377909	0.624472
PLXDC1	0.000787605	0.00089936	0.381172	0.625547
PARD6B	-0.000792132	0.000908347	0.383176	0.625547
RHOA	-0.000828971	0.000958347	0.387038	0.628068
FRMD4A	-0.00320608	0.00373705	0.390937	0.630618
CLDN9	0.000729871	0.000859204	0.395618	0.634393
LIN7B	0.00188087	0.00223409	0.399846	0.635396
MLLT4	-0.00134326	0.0015992	0.400933	0.635396
DSC2	0.000959695	0.00115849	0.407445	0.641962
MTDH	-0.000838981	0.00103245	0.416439	0.652341
RAP2B	0.00057826	0.000719552	0.421605	0.65464
TMEM47	0.0050483	0.00629715	0.422738	0.65464
ARHGAP17	-0.00223236	0.00280239	0.425689	0.655464
NOTCH1	0.000764219	0.00103467	0.460145	0.695224
CDH18	0.000509625	0.000690192	0.460283	0.695224
ITGA6	0.00259982	0.00353248	0.461745	0.695224
ADAM15	0.000477299	0.000648565	0.461772	0.695224
PPP1CA	0.00102823	0.00141928	0.468778	0.701872
BMPR2	-0.00161552	0.0022508	0.472908	0.704165
TSPAN33	-0.00100553	0.00142835	0.481446	0.712961
CLDN22	-0.00225367	0.00323025	0.485378	0.714878
IGSF21	0.000692782	0.0010089	0.492289	0.721137
DLG5	0.00119936	0.00178597	0.501872	0.727733
RAP2C	-0.000648741	0.000966697	0.502163	0.727733
EFNA5	-0.00105827	0.00159529	0.507092	0.730968
CLDN1	0.0018449	0.00284541	0.51674	0.740934
SORBS1	0.0012961	0.00204717	0.526656	0.751178
PTPRK	-0.000893082	0.00142573	0.53105	0.753479
PPAP2B	0.000491075	0.000800392	0.539517	0.761506
VASP	0.000506386	0.000840871	0.547031	0.768111
CDH17	-0.00258946	0.0043627	0.552816	0.772233
LIN7A	-0.000955874	0.0016628	0.565388	0.785745
PRKCI	-0.000514052	0.00091044	0.572333	0.791338
AMOT	0.000510612	0.000920521	0.5791	0.796631
STRN	-0.000858529	0.00157541	0.585783	0.801754
MAGI1	0.00087389	0.00164483	0.595215	0.810527
CAMSAP3	0.00121513	0.00231816	0.600154	0.810527
APC	-0.00127853	0.00248091	0.606311	0.810527
MXRA8	0.00078677	0.00152747	0.606497	0.810527
ARHGEF2	0.00225801	0.00439174	0.607147	0.810527
CCDC85C	0.000480181	0.000993143	0.628744	0.825733
MYO1E	-0.00024327	0.00050363	0.629073	0.825733
PVR	0.000489221	0.00103179	0.635396	0.825733
GJA1	0.000449055	0.000948978	0.636072	0.825733
FRMPD2	-0.000680749	0.001441	0.636631	0.825733
PARD6G	0.00163574	0.00346446	0.63682	0.825733
CLDN7	-0.000632128	0.00135918	0.641875	0.828324
CTNND1	0.0010664	0.00233126	0.647357	0.83144
DLG3	-0.000655727	0.00148996	0.659867	0.839841
SHROOM1	0.00105195	0.002392	0.660097	0.839841
SAPCD2	0.00113295	0.00260216	0.66328	0.839948
RAB13	0.000903595	0.00217482	0.677791	0.850651
CDH13	0.00131678	0.00317158	0.67801	0.850651
TJP3	-0.00089069	0.00222169	0.688489	0.854845
ADD1	-0.000606521	0.00153099	0.691986	0.854845
PDZD11	0.000667965	0.00168686	0.692118	0.854845
CDK4	0.000199707	0.000507549	0.69397	0.854845
EIF4G2	-0.000232139	0.000597858	0.697805	0.855679
UBN1	0.000307155	0.000817532	0.707133	0.863212
CYTH3	-0.000640587	0.00174553	0.713629	0.866747
CLDN24	0.000207702	0.000588525	0.724149	0.866747
FZD5	-0.00025569	0.000728969	0.725772	0.866747
CDC42EP4	0.000238273	0.000684084	0.727608	0.866747
PKP2	-0.00031397	0.000904224	0.728421	0.866747
FLOT2	0.000353839	0.00102279	0.729376	0.866747
SHROOM2	0.000929967	0.00271991	0.732418	0.866747
JUP	-0.000386789	0.00118762	0.744664	0.877409
NPHP1	-0.000561973	0.00182612	0.758279	0.886347
CYTH1	0.000864738	0.00281611	0.758792	0.886347
SIPA1L3	0.000937659	0.00309802	0.762146	0.886444
PTPRM	0.00096457	0.00327098	0.76808	0.889529
PGM5	0.000384679	0.00135489	0.776473	0.894358
PXN	0.000493724	0.00176621	0.779832	0.894358
RAPGEF2	-0.000312084	0.00112862	0.782151	0.894358
PPP1R9B	0.000522463	0.00199149	0.793053	0.901971
LSR	0.000131499	0.000507786	0.795662	0.901971
SMAD7	-0.000597499	0.0023455	0.798922	0.901971
CTNNA2	-0.000413011	0.00168475	0.806343	0.901971
PARK7	-0.000352926	0.00144822	0.807466	0.901971
MAGI2	-0.000485018	0.00200419	0.808778	0.901971
CDHR3	-0.000138428	0.000609603	0.820362	0.907105
S100A11	0.000336222	0.00148627	0.821031	0.907105
PLEKHA7	0.000704979	0.00315931	0.823424	0.907105
ANXA1	0.000257224	0.00129187	0.842177	0.924008
INADL	0.000163136	0.00086257	0.849992	0.927991
VAPA	-0.000110025	0.000606414	0.856025	0.927991
CLDN11	-0.000468759	0.00260964	0.857446	0.927991
LRRC7	0.000624253	0.00352675	0.859504	0.927991
CLDN10	0.00034214	0.00201245	0.865001	0.928867
CSDA	-0.000571852	0.00341908	0.867171	0.928867
CDH26	-0.000196653	0.0012198	0.871922	0.930279
AMOTL2	-0.000174111	0.00116311	0.881006	0.934309
ZYX	0.000341389	0.00231167	0.882595	0.934309
MARVELD2	-0.000374933	0.00261787	0.886116	0.934387
CLDN19	0.000326219	0.00260541	0.900359	0.942756
BVES	0.00035891	0.00288548	0.90101	0.942756
DDX6	-0.000149188	0.00142142	0.91641	0.950106
CDH3	-0.000268743	0.00260236	0.917749	0.950106
SYNM	0.00016831	0.00164595	0.918553	0.950106
FLOT1	0.000200226	0.0020542	0.922352	0.950408
FMN1	-0.00036923	0.00413559	0.928859	0.953487
CYTH2	-0.000135451	0.00166394	0.935121	0.956293
ASH1L	0.000106998	0.00147302	0.942094	0.959802
SHROOM3	-0.000222391	0.00368269	0.951846	0.96527
SYMPK	-5.56581e-05	0.000977294	0.954584	0.96527
USP53	-0.000116545	0.00282928	0.967142	0.974333
MARVELD3	3.37739e-05	0.0010597	0.974575	0.978184
CEACAM1	2.69469e-05	0.00271064	0.992068	0.992068
